# Supplementary material for: Chemical modulation of A I RE III C IV QVI4 family compounds for band gap and optical anisotropy enhancement
Source: Royal Society of Chemistry journal article supplement (doi:10.1039/d4qi01738b), 2024-01-01
Supplement: d4qi01738b1.pdf [file d4qi01738b1.pdf]

## Supporting Information

### **Chemical Modulation of $A^I RE^{III} C^{IV} Q^{VI}_4$ Family Compounds for Band Gap and Optical Anisotropy Enhancement**

Hongshan Wang,<sup>a,b</sup> Xueting Pan,<sup>a</sup> Shilie Pan<sup>a,b\*</sup> and Junjie Li,<sup>a,b,\*</sup>

*<sup>a</sup>Research Center for Crystal Materials; CAS Key Laboratory of Functional Materials  
and Devices for Special Environments, Xinjiang Technical Institute of Physics &  
Chemistry, CAS, Urumqi 830011, China*

*<sup>b</sup>Center of Materials Science and Optoelectronics Engineering, University of Chinese  
Academy of Sciences, Beijing 100049, China*

*\*To whom correspondence should be addressed, E-mails: [slpan@ms.xjb.ac.cn](mailto:slpan@ms.xjb.ac.cn) (Shilie  
Pan), [lijunjie@ms.xjb.ac.cn](mailto:lijunjie@ms.xjb.ac.cn) (Junjie Li)*

**Table S1.** Crystal data and structure refinements of  $A^I\text{RE}^{\text{III}}\text{SiQ}^{\text{VI}}_4$  ( $A^I = \text{Ag, Na}$ ;  $\text{RE}^{\text{III}} = \text{La, Y}$ ;  $\text{Q}^{\text{VI}} = \text{S, Se}$ ).

| Empirical formula                                | AgYSiS <sub>4</sub>                                                  | AgLaSiS <sub>4</sub>                                                 | NaLaSiS <sub>4</sub>                                                 | NaLaSiSe <sub>4</sub>                                                |
|--------------------------------------------------|----------------------------------------------------------------------|----------------------------------------------------------------------|----------------------------------------------------------------------|----------------------------------------------------------------------|
| Formula weight (Da)                              | 353.11                                                               | 403.11                                                               | 318.23                                                               | 505.83                                                               |
| Temperature (K)                                  | 298                                                                  | 298                                                                  | 221.0                                                                | 298                                                                  |
| Crystal system                                   | Monoclinic                                                           |                                                                      |                                                                      |                                                                      |
| Space group                                      | $P2_1/c$                                                             |                                                                      |                                                                      |                                                                      |
| $a(\text{Å})$                                    | 8.9439(19)                                                           | 8.9451(8)                                                            | 9.314(4)                                                             | 9.8134(13)                                                           |
| $b(\text{Å})$                                    | 10.452(2)                                                            | 10.5565(9)                                                           | 10.470(4)                                                            | 10.9219(15)                                                          |
| $c(\text{Å})$                                    | 6.5622(13)                                                           | 6.9470(6)                                                            | 6.868(3)                                                             | 7.0956(8)                                                            |
| $V(\text{Å}^3)$                                  | 588.2(2)                                                             | 632.47                                                               | 652.9(5)                                                             | 739.82(16)                                                           |
| $Z$                                              | 4                                                                    |                                                                      |                                                                      |                                                                      |
| $D_{\text{calc}}$ (g/cm <sup>-3</sup> )          | 3.988                                                                | 4.233                                                                | 3.237                                                                | 4.541                                                                |
| Absorption coefficient (mm <sup>-1</sup> )       | 14.620                                                               | 11.130                                                               | 7.936                                                                | 25.555                                                               |
| $F(000)$                                         | 656                                                                  | 728                                                                  | 584                                                                  | 872                                                                  |
| Completeness to $\theta$ (%)                     | 98.70                                                                | 100.0                                                                | 100.0                                                                | 98.5                                                                 |
| $\theta$ range for data collection/ <sup>o</sup> | 2.375 to 27.537                                                      | 2.362 to 27.492                                                      | 2.243 to 27.490                                                      | 3.492 to 27.491                                                      |
| Index ranges                                     | -11 $\leq$ h $\leq$ 11, -13 $\leq$ k $\leq$ 13, -8 $\leq$ l $\leq$ 8 | -11 $\leq$ h $\leq$ 11, -13 $\leq$ k $\leq$ 13, -8 $\leq$ l $\leq$ 9 | -12 $\leq$ h $\leq$ 11, -13 $\leq$ k $\leq$ 13, -8 $\leq$ l $\leq$ 8 | -12 $\leq$ h $\leq$ 11, -14 $\leq$ k $\leq$ 14, -9 $\leq$ l $\leq$ 9 |
| Reflections collected                            | 7287                                                                 | 11633                                                                | 9394                                                                 | 5449                                                                 |
| Independent reflections                          | 1338 [ $R(\text{int}) = 0.0988$ ]                                    | 1450 [ $R(\text{int}) = 0.0721$ ]                                    | 1491 [ $R(\text{int}) = 0.0737$ ]                                    | 1668 [ $R(\text{int}) = 0.0792$ ]                                    |

|                                                      |                |                |                |                |
|------------------------------------------------------|----------------|----------------|----------------|----------------|
| <b>Observed reflections</b>                          | 980            | 1220           | 1336           | 1400           |
| <b>[<math>I &gt; 2\sigma(I)</math>]</b>              |                |                |                |                |
| <b>Data / restraints / parameters</b>                | 1338 / 0 / 65  | 1450 / 0 / 65  | 1491 / 0 / 65  | 1668 / 0 / 65  |
| <b>Absorpt correction</b>                            |                | multi-scan     |                |                |
| <b>type</b>                                          |                |                |                |                |
| <b>GooF on <math>F^2</math></b>                      | 1.039          | 1.118          | 1.070          | 1.005          |
| <b><math>R_1, wR_2 (I &gt; 2\sigma(I))^a</math></b>  | 0.0480, 0.1176 | 0.0310, 0.0750 | 0.0272, 0.0581 | 0.0404, 0.0743 |
| <b><math>R_1, wR_2</math> (all data)<sup>a</sup></b> | 0.0713, 0.1276 | 0.0372, 0.0774 | 0.0307, 0.0607 | 0.0485, 0.0780 |
| <b>diff peak, hole (e/Å<sup>3</sup>)</b>             | 1.685, -0.971  | 1.456, 1.407   | 0.971, -0.746  | 1.212, 1.445   |

---

<sup>a</sup>  $R_1 = \frac{\sum ||F_o| - |F_c||}{\sum |F_o|}$  and  $wR_2 = [\sum w(F_o^2 - F_c^2)^2 / \sum wF_o^4]^{1/2}$  for  $F_o^2 > 2\sigma(F_o^2)$ .

**Table S2.** Fractional atomic coordinates, equivalent isotropic displacement parameters ( $\text{\AA}^2 \times 10^3$ ), and bond valence sum (BVS) for AgLaSiS<sub>4</sub>.  $U_{\text{eq}}$  is defined as 1/3 of the trace of the orthogonalized  $U_{\text{IJ}}$  tensor.

| Atoms                    | Wyck. | <i>x</i>  | <i>y</i>  | <i>z</i>   | $U_{\text{eq}}$ | BVS <sup>[a]</sup> |
|--------------------------|-------|-----------|-----------|------------|-----------------|--------------------|
| <b>Ag(1)</b>             | 4e    | 0.1122(1) | 0.2458(1) | -0.0720(1) | 43(1)           | 0.99               |
| <b>La(1)</b>             | 4e    | 0.3484(1) | 0.6039(1) | 0.7181(1)  | 17(1)           | 2.97               |
| <b>Si(1)</b>             | 4e    | 0.2573(2) | 0.5499(2) | 0.1903(3)  | 17(1)           | 4.08               |
| <b>S(1)</b>              | 4e    | 0.4686(2) | 0.6366(2) | 0.3557(2)  | 18(1)           | 1.97               |
| <b>S(2)</b>              | 4e    | 0.1261(2) | 0.4880(2) | 0.3796(2)  | 20(1)           | 1.95               |
| <b>S(3)</b>              | 4e    | 0.1474(2) | 0.6941(2) | -0.0111(2) | 18(1)           | 1.99               |
| <b>S(4)</b>              | 4e    | 0.3236(2) | 0.4060(2) | 0.0153(2)  | 19(1)           | 2.12               |
| <b>GII<sup>[b]</sup></b> |       |           |           |            |                 | 0.053              |

[a] The bond valence sum is calculated by bond-valence theory ( $S_{ij} = \exp[(R_0 - R)/B]$ , where  $R$  is an empirical constant,  $R_0$  is the length of bond I (in angstroms), and  $B = 0.37$ ).

[b] The global instability index (GII) calculated using

$$G = \sqrt{\frac{\sum_{i=1}^n (BVS - v_i)}{N}} \quad (1)$$

where  $N$  is the number of atoms in the formula unit. The GII is calculated as 0.053, which is lower than 0.2, indicating the rationality of the structure from this side.

**Table S3.** Fractional atomic coordinates, equivalent isotropic displacement parameters ( $\text{\AA}^2 \times 10^3$ ), and bond valence sum (BVS) for AgYSiS<sub>4</sub>.  $U_{\text{eq}}$  is defined as 1/3 of the trace of the orthogonalized  $U_{\text{IJ}}$  tensor.

| Atoms                    | Wyck. | <i>x</i>  | <i>y</i>  | <i>z</i>   | $U_{\text{eq}}$ | BVS <sup>[a]</sup> |
|--------------------------|-------|-----------|-----------|------------|-----------------|--------------------|
| Ag(1)                    | 4e    | 0.1134(1) | 0.7485(1) | -0.0667(2) | 41(1)           | 0.94               |
| Y(1)                     | 4e    | 0.3532(1) | 0.3875(1) | 0.7233(1)  | 21(1)           | 2.74               |
| Si(1)                    | 4e    | 0.2644(3) | 0.4484(2) | 0.1985(4)  | 19(1)           | 4.14               |
| S(1)                     | 4e    | 0.4736(3) | 0.3578(2) | 0.3748(4)  | 21(1)           | 1.92               |
| S(2)                     | 4e    | 0.1522(3) | 0.3035(2) | -0.0187(4) | 21(1)           | 1.90               |
| S(3)                     | 4e    | 0.3308(3) | 0.5886(2) | 0.0066(4)  | 20(1)           | 2.06               |
| S(4)                     | 4e    | 0.1385(3) | 0.5137(2) | 0.4000(4)  | 23(1)           | 1.95               |
| <b>GII<sup>[b]</sup></b> |       |           |           |            |                 | 0.112              |

[a] The bond valence sum is calculated by bond-valence theory ( $S_{ij} = \exp[(R_0 - R)/B]$ , where  $R$  is an empirical constant,  $R_0$  is the length of bond I (in angstroms), and  $B = 0.37$ ).

[b] The global instability index (GII) calculated using

$$G = \sqrt{\frac{\sum_{i=1}^n (BVS - v_i)}{N}} \quad (1)$$

where  $N$  is the number of atoms in the formula unit. The GII is calculated as 0.112, which is lower than 0.2, indicating the rationality of the structure from this side.

**Table S4.** Fractional atomic coordinates, equivalent isotropic displacement parameters ( $\text{\AA}^2 \times 10^3$ ), and bond valence sum (BVS) for NaLaSiS<sub>4</sub>.  $U_{\text{eq}}$  is defined as 1/3 of the trace of the orthogonalized  $U_{\text{IJ}}$  tensor.

| Atoms                    | Wyck. | <i>x</i>  | <i>y</i>  | <i>z</i>  | $U_{\text{eq}}$ | BVS <sup>[a]</sup> |
|--------------------------|-------|-----------|-----------|-----------|-----------------|--------------------|
| Na(1)                    | 4e    | 0.4116(3) | 0.207(3)  | 0.2602(4) | 53(1)           | 0.92               |
| La(1)                    | 4e    | 0.8579(1) | 0.3946(1) | 1.2317(1) | 13(1)           | 2.91               |
| Si(1)                    | 4e    | 0.7661(1) | 0.4564(1) | 0.7060(2) | 13(1)           | 4.08               |
| S(1)                     | 4e    | 0.8276(1) | 0.6008(1) | 0.5241(2) | 15(1)           | 1.97               |
| S(2)                     | 4e    | 0.6599(1) | 0.3115(1) | 0.5104(2) | 16(1)           | 2.06               |
| S(3)                     | 4e    | 0.6459(1) | 0.5245(1) | 0.9068(2) | 18(1)           | 1.85               |
| S(4)                     | 4e    | 0.9671(1) | 0.3654(1) | 0.8574(2) | 13(1)           | 2.01               |
| <b>GII<sup>[b]</sup></b> |       |           |           |           |                 | <b>0.073</b>       |

[a] The bond valence sum is calculated by bond-valence theory ( $S_{ij} = \exp[(R_0 - R)/B]$ , where  $R$  is an empirical constant,  $R_0$  is the length of bond I (in angstroms), and  $B = 0.37$ ).

[b] The global instability index (GII) calculated using

$$G = \sqrt{\frac{\sum_{i=1}^n (BVS - v_i)}{N}} \quad (1)$$

where  $N$  is the number of atoms in the formula unit. The GII is calculated as 0.073, which is lower than 0.2, indicating the rationality of the structure from this side.

**Table S5.** Fractional atomic coordinates, equivalent isotropic displacement parameters ( $\text{\AA}^2 \times 10^3$ ), and bond valence sum (BVS) for NaLaSiSe<sub>4</sub>.  $U_{\text{eq}}$  is defined as 1/3 of the trace of the orthogonalized  $U_{\text{IJ}}$  tensor.

| Atoms                    | Wyck. | <i>x</i>  | <i>y</i>  | <i>z</i>   | $U_{\text{eq}}$ | BVS <sup>[a]</sup> |
|--------------------------|-------|-----------|-----------|------------|-----------------|--------------------|
| Na(1)                    | 4e    | 0.5835(7) | 0.2016(6) | 0.7500(8)  | 75(2)           | 0.91               |
| La(1)                    | 4e    | 0.1406(1) | 0.3943(1) | -0.2323(1) | 15(1)           | 2.76               |
| Si(1)                    | 4e    | 0.2302(3) | 0.4558(2) | 0.2921(3)  | 14(1)           | 4.03               |
| Se(1)                    | 4e    | 0.3372(1) | 0.3085(1) | 0.4967(1)  | 17(1)           | 2.03               |
| Se(2)                    | 4e    | 0.1696(1) | 0.6034(1) | 0.4805(1)  | 17(1)           | 1.95               |
| Se(3)                    | 4e    | 0.3571(1) | 0.5239(1) | 0.0907(1)  | 20(1)           | 1.78               |
| Se(4)                    | 4e    | 0.0264(1) | 0.3632(1) | 0.1368(1)  | 14(1)           | 1.95               |
| <b>GII<sup>[b]</sup></b> |       |           |           |            |                 | <b>0.116</b>       |

[a] The bond valence sum is calculated by bond-valence theory ( $S_{ij} = \exp[(R_0 - R)/B]$ , where  $R$  is an empirical constant,  $R_0$  is the length of bond I (in angstroms), and  $B = 0.37$ ).

[b] The global instability index (GII) calculated using

$$G = \sqrt{\frac{\sum_{i=1}^n (BVS - v_i)}{N}} \quad (1)$$

where  $N$  is the number of atoms in the formula unit. The GII is calculated as 0.116, which is lower than 0.2, indicating the rationality of the structure from this side.

**Table S6.** Anisotropic displacement parameters ( $\text{\AA}^2 \times 10^3$ ) for AgLaSi<sub>4</sub>. The Anisotropic displacement factor exponent takes the form:  $2\pi^2[h^2a^2U_{11}+2hka*b*U_{12}+\dots]$ .

| <b>Atoms</b> | <b>U<sub>11</sub></b> | <b>U<sub>22</sub></b> | <b>U<sub>33</sub></b> | <b>U<sub>23</sub></b> | <b>U<sub>13</sub></b> | <b>U<sub>12</sub></b> |
|--------------|-----------------------|-----------------------|-----------------------|-----------------------|-----------------------|-----------------------|
| <b>Ag(1)</b> | 39(1)                 | 27(1)                 | 65(1)                 | -11(1)                | 20(1)                 | -7(1)                 |
| <b>La(1)</b> | 24(1)                 | 15(1)                 | 14(1)                 | 0(1)                  | 6(1)                  | 2(1)                  |
| <b>Si(1)</b> | 21(1)                 | 14(1)                 | 16(1)                 | -1(1)                 | 6(1)                  | 0(1)                  |
| <b>S(1)</b>  | 21(1)                 | 14(1)                 | 18(1)                 | 0(1)                  | 6(1)                  | -1(1)                 |
| <b>S(2)</b>  | 25(1)                 | 19(1)                 | 19(1)                 | -2(1)                 | 10(1)                 | -5(1)                 |
| <b>S(3)</b>  | 22(1)                 | 15(1)                 | 16(1)                 | 1(1)                  | 3(1)                  | 0(1)                  |
| <b>S(4)</b>  | 21(1)                 | 16(1)                 | 19(1)                 | -2(1)                 | 6(1)                  | 1(1)                  |



**Table S7.** Anisotropic displacement parameters ( $\text{\AA}^2 \times 10^3$ ) for AgYSiS<sub>4</sub>. The Anisotropic displacement factor exponent takes the form:  $2\pi^2[h^2a^2U_{11}+2hka^*b^*U_{12}+\dots]$ .

| <b>Atoms</b> | <b>U<sub>11</sub></b> | <b>U<sub>22</sub></b> | <b>U<sub>33</sub></b> | <b>U<sub>23</sub></b> | <b>U<sub>13</sub></b> | <b>U<sub>12</sub></b> |
|--------------|-----------------------|-----------------------|-----------------------|-----------------------|-----------------------|-----------------------|
| <b>Ag(1)</b> | 45(1)                 | 25(1)                 | 57(1)                 | 7(1)                  | 17(1)                 | 6(1)                  |
| <b>Y(1)</b>  | 29(1)                 | 16(1)                 | 17(1)                 | 0(1)                  | 7(1)                  | 0(1)                  |
| <b>Si(1)</b> | 28(2)                 | 12(1)                 | 17(1)                 | -1(1)                 | 7(1)                  | 0(1)                  |
| <b>S(1)</b>  | 27(2)                 | 16(1)                 | 20(1)                 | 0(1)                  | 9(1)                  | 2(1)                  |
| <b>S(2)</b>  | 28(2)                 | 16(1)                 | 19(1)                 | -1(1)                 | 6(1)                  | -2(1)                 |
| <b>S(3)</b>  | 28(2)                 | 14(1)                 | 20(1)                 | 1(1)                  | 8(1)                  | -2(1)                 |
| <b>S(4)</b>  | 32(2)                 | 19(1)                 | 19(1)                 | 2(1)                  | 11(1)                 | 3(1)                  |

**Table S8.** Anisotropic displacement parameters ( $\text{\AA}^2 \times 10^3$ ) for NaLaSiS<sub>4</sub>. The Anisotropic displacement factor exponent takes the form:  $2\pi^2[h^2a^2U_{11}+2hka*b*U_{12}+\dots]$ .

| <b>Atoms</b> | <b>U<sub>11</sub></b> | <b>U<sub>22</sub></b> | <b>U<sub>33</sub></b> | <b>U<sub>23</sub></b> | <b>U<sub>13</sub></b> | <b>U<sub>12</sub></b> |
|--------------|-----------------------|-----------------------|-----------------------|-----------------------|-----------------------|-----------------------|
| <b>Na(1)</b> | 58(2)                 | 57(2)                 | 34(1)                 | 6(1)                  | -13(1)                | -30(1)                |
| <b>La(1)</b> | 19(1)                 | 11(1)                 | 10(1)                 | 0(1)                  | 3(1)                  | -1(1)                 |
| <b>Si(1)</b> | 16(1)                 | 12(1)                 | 10(1)                 | 1(1)                  | 3(1)                  | 0(1)                  |
| <b>S(1)</b>  | 20(1)                 | 12(1)                 | 13(1)                 | 2(1)                  | 3(1)                  | 0(1)                  |
| <b>S(2)</b>  | 19(1)                 | 14(1)                 | 13(1)                 | -1(1)                 | 1(1)                  | -2(1)                 |
| <b>S(3)</b>  | 20(1)                 | 19(1)                 | 15(1)                 | 1(1)                  | 6(1)                  | 6(1)                  |
| <b>S(4)</b>  | 16(1)                 | 10(1)                 | 13(1)                 | 1(1)                  | 3(1)                  | 0(1)                  |

**Table S9.** Anisotropic displacement parameters ( $\text{\AA}^2 \times 10^3$ ) for NaLaSiSe<sub>4</sub>. The Anisotropic displacement factor exponent takes the form:  $2\pi^2[h^2a^2U_{11}+2hka^*b^*U_{12}+\dots]$ .

| <b>Atoms</b> | <b>U<sub>11</sub></b> | <b>U<sub>22</sub></b> | <b>U<sub>33</sub></b> | <b>U<sub>23</sub></b> | <b>U<sub>13</sub></b> | <b>U<sub>12</sub></b> |
|--------------|-----------------------|-----------------------|-----------------------|-----------------------|-----------------------|-----------------------|
| <b>Na(1)</b> | 71(4)                 | 89(5)                 | 47(3)                 | -7(3)                 | -23(3)                | 49(4)                 |
| <b>La(1)</b> | 17(1)                 | 14(1)                 | 13(1)                 | 0(1)                  | 4(1)                  | 0(1)                  |
| <b>Si(1)</b> | 14(1)                 | 14(1)                 | 14(1)                 | -2(1)                 | 3(1)                  | 0(1)                  |
| <b>Se(1)</b> | 16(1)                 | 19(1)                 | 16(1)                 | 2(1)                  | 2(1)                  | 2(1)                  |
| <b>Se(2)</b> | 18(1)                 | 16(1)                 | 17(1)                 | -2(1)                 | 3(1)                  | 1(1)                  |
| <b>Se(3)</b> | 20(1)                 | 23(1)                 | 18(1)                 | -1(1)                 | 7(1)                  | -6(1)                 |
| <b>Se(4)</b> | 14(1)                 | 14(1)                 | 15(1)                 | 0(1)                  | 3(1)                  | 0(1)                  |

**Table S10.** Selected bond lengths (Å) of AgLaSiS<sub>4</sub>.

| Atoms        | Distance (Å) | Atoms        | Distance (Å) |
|--------------|--------------|--------------|--------------|
| Ag(1)-S(2)#1 | 2.4978(19)   | La(1)-S(3)#4 | 2.9655(16)   |
| Ag(1)-S(3)#2 | 2.6149(17)   | La(1)-S(4)#3 | 3.0270(17)   |
| Ag(1)-S(4)   | 2.4897(17)   | La(1)-S(4)#5 | 2.9866(17)   |
| La(1)-S(1)#3 | 3.1361(17)   | Si(1)-S(1)   | 2.140(2)     |
| La(1)-S(1)#4 | 3.0045(17)   | Si(1)-S(2)   | 2.086(2)     |
| La(1)-S(1)   | 3.0084(16)   | Si(1)-S(3)   | 2.124(2)     |
| La(1)-S(2)   | 2.9158(17)   | Si(1)-S(4)   | 2.126(2)     |
| La(1)-S(3)#5 | 3.0779(16)   |              |              |

Symmetry transformations used to generate equivalent atoms:

#1  $x, -y+1/2, z-1/2$ ; #2  $-x, -y+1, -z$ ; #3  $-x+1, -y+1, -z+1$ ; #4  $x, -y+3/2, z+1/2$ ; #5  $x, y, z+1$ .

**Table S11.** Selected bond angles (°) of AgLaSiS<sub>4</sub>.

| Atoms               | Angle (°)   | Atoms               | Angle (°)  |
|---------------------|-------------|---------------------|------------|
| S(2)#1-Ag(1)-S(3)#2 | 110.38(6)   | S(3)#5-La(1)-S(1)#3 | 139.93(4)  |
| S(4)-Ag(1)-S(2)#1   | 129.96(6)   | S(3)#4-La(1)-S(1)   | 76.62(4)   |
| S(4)-Ag(1)-S(3)#2   | 116.30(6)   | S(3)#4-La(1)-S(3)#5 | 74.72(3)   |
| S(1)#4-La(1)-S(1)   | 89.11(4)    | S(3)#4-La(1)-S(4)#5 | 136.76(5)  |
| S(1)#4-La(1)-S(1)#3 | 129.190(17) | S(3)#4-La(1)-S(4)#3 | 134.79(5)  |
| S(1)-La(1)-S(1)#3   | 68.78(5)    | S(4)#5-La(1)-S(1)   | 140.11(5)  |
| S(1)-La(1)-S(3)#5   | 150.75(5)   | S(4)#3-La(1)-S(1)#3 | 66.97(4)   |
| S(1)#4-La(1)-S(3)#5 | 75.01(4)    | S(4)#5-La(1)-S(1)#3 | 71.60(4)   |
| S(1)#4-La(1)-S(4)#3 | 68.29(4)    | S(4)#5-La(1)-S(1)#4 | 120.25(4)  |
| S(1)-La(1)-S(4)#3   | 90.71(4)    | S(4)#5-La(1)-S(3)#5 | 68.36(4)   |
| S(2)-La(1)-S(1)#3   | 78.59(5)    | S(4)#3-La(1)-S(3)#5 | 105.39(4)  |
| S(2)-La(1)-S(1)     | 72.06(4)    | S(4)#5-La(1)-S(4)#3 | 77.90(5)   |
| S(2)-La(1)-S(1)#4   | 138.52(5)   | S(2)-Si(1)-S(1)     | 111.11(10) |
| S(2)-La(1)-S(3)#4   | 71.47(5)    | S(2)-Si(1)-S(3)     | 113.60(10) |
| S(2)-La(1)-S(3)#5   | 103.81(5)   | S(2)-Si(1)-S(4)     | 115.21(11) |
| S(2)-La(1)-S(4)#5   | 95.97(5)    | S(3)-Si(1)-S(1)     | 103.61(10) |
| S(2)-La(1)-S(4)#3   | 145.26(5)   | S(3)-Si(1)-S(4)     | 106.62(10) |
| S(3)#4-La(1)-S(1)#3 | 139.70(4)   | S(4)-Si(1)-S(1)     | 105.76(10) |
| S(3)#4-La(1)-S(1)#4 | 68.29(4)    |                     |            |

Symmetry transformations used to generate equivalent atoms:

#1  $x, -y+1/2, z-1/2$ ; #2  $-x, -y+1, -z$ ; #3  $-x+1, -y+1, -z+1$ ; #4  $x, -y+3/2, z+1/2$ ; #5  $x, y, z+1$ .

**Table S12.** Selected bond lengths (Å) of AgYSiS<sub>4</sub>.

| Atoms        | Distance (Å) | Atoms       | Distance (Å) |
|--------------|--------------|-------------|--------------|
| Ag(1)-S(2)#3 | 2.647(3)     | Y(1)-S(2)#5 | 2.850(3)     |
| Ag(1)-S(3)   | 2.505(3)     | Y(1)-S(3)#6 | 2.850(2)     |
| Ag(1)-S(4)#1 | 2.511(3)     | Y(1)-S(3)#4 | 2.889(3)     |
| Y(1)-S(1)#4  | 3.235(3)     | Si(1)-S(1)  | 2.123(4)     |
| Y(1)-S(1)    | 2.808(2)     | Si(1)-S(2)  | 2.126(4)     |
| Y(1)-S(1)#5  | 2.849(3)     | Si(1)-S(3)  | 2.124(3)     |
| Y(1)-S(2)#6  | 2.932(3)     | Si(1)-S(4)  | 2.081(3)     |

Symmetry transformations used to generate equivalent atoms:

#1  $x, -y+3/2, z-1/2$ ; #2  $x, -y+3/2, z+1/2$ ; #3  $-x, -y+1, -z$ ; #4  $-x+1, -y+1, -z+1$ ; #5  $x, -y+1/2, z+1/2$ ; #6  $x, y, z+1$ .

**Table S13.** Selected bond angles (°) of AgYSiS<sub>4</sub>.

| Atoms               | Angle (°) | Atoms              | Angle (°)  |
|---------------------|-----------|--------------------|------------|
| S(3)-Ag(1)-S(2)#3   | 121.12(8) | S(2)#6-Y(1)-S(1)#4 | 140.19(7)  |
| S(3)-Ag(1)-S(4)#1   | 126.39(9) | S(2)#5-Y(1)-S(2)#6 | 73.66(6)   |
| S(4)#1-Ag(1)-S(2)#3 | 109.24(9) | S(2)#5-Y(1)-S(3)#6 | 136.90(8)  |
| S(1)-Y(1)-S(1)#5    | 89.44(6)  | S(2)#5-Y(1)-S(3)#4 | 139.01(8)  |
| S(1)#5-Y(1)-S(1)#4  | 130.93(4) | S(3)#4-Y(1)-S(1)#4 | 67.09(7)   |
| S(1)-Y(1)-S(1)#4    | 67.22(7)  | S(3)#6-Y(1)-S(1)#4 | 69.49(6)   |
| S(1)#5-Y(1)-S(2)#6  | 76.22(7)  | S(3)#4-Y(1)-S(2)#6 | 108.97(7)  |
| S(1)-Y(1)-S(2)#6    | 151.26(8) | S(3)#6-Y(1)-S(2)#6 | 71.10(7)   |
| S(1)-Y(1)-S(2)#5    | 78.21(7)  | S(3)#6-Y(1)-S(3)#4 | 76.94(8)   |
| S(1)#5-Y(1)-S(2)#5  | 71.32(8)  | S(1)-Si(1)-S(2)    | 102.86(14) |
| S(1)#5-Y(1)-S(3)#4  | 69.92(7)  | S(1)-Si(1)-S(3)    | 106.23(16) |
| S(1)-Y(1)-S(3)#4    | 88.54(8)  | S(3)-Si(1)-S(2)    | 104.62(14) |
| S(1)-Y(1)-S(3)#6    | 136.64(7) | S(4)-Si(1)-S(1)    | 110.60(14) |
| S(1)#5-Y(1)-S(3)#6  | 121.71(7) | S(4)-Si(1)-S(2)    | 114.97(17) |
| S(2)#5-Y(1)-S(1)#4  | 136.68(7) | S(4)-Si(1)-S(3)    | 116.34(14) |

Symmetry transformations used to generate equivalent atoms:

#1  $x, -y+3/2, z-1/2$ ; #2  $x, -y+3/2, z+1/2$ ; #3  $-x, -y+1, -z$ ; #4  $-x+1, -y+1, -z+1$ ; #5  $x, -y+1/2, z+1/2$ ; #6  $x, y, z+1$ .

**Table S14.** Selected bond lengths (Å) of NaLaSiS<sub>4</sub>.

| Atoms        | Distance (Å) | Atoms        | Distance (Å) |
|--------------|--------------|--------------|--------------|
| Na(1)-S(1)#4 | 2.841(3)     | La(1)-S(2)#6 | 3.0647(15)   |
| Na(1)-S(2)#1 | 3.178(4)     | La(1)-S(3)   | 2.9601(14)   |
| Na(1)-S(2)   | 2.780(3)     | La(1)-S(4)   | 2.9837(15)   |
| Na(1)-S(3)#5 | 3.039(3)     | La(1)-S(4)#2 | 2.9668(15)   |
| Na(1)-S(3)#3 | 3.116(3)     | La(1)-S(4)#7 | 3.1288(15)   |
| Na(1)-S(3)#1 | 3.267(4)     | Si(1)-S(1)   | 2.1194(17)   |
| La(1)-S(1)#6 | 3.0041(14)   | Si(1)-S(2)   | 2.1203(17)   |
| La(1)-S(1)#7 | 3.0348(17)   | Si(1)-S(3)   | 2.0861(18)   |
| La(1)-S(2)#2 | 3.0199(14)   | Si(1)-S(4)   | 2.1515(18)   |

Symmetry transformations used to generate equivalent atoms:

#1 x, -y+1/2, z-1/2; #2 x, -y+1/2, z+1/2; #3 -x+1, y-1/2, -z+3/2; #4 -x+1, y-1/2, -z+1/2;

#5 -x+1, -y+1, -z+1; #6 x, y, z+1; #7 -x+2, -y+1, b-z+2.



**Table S15.** Selected bond angles (°) of NaLaSi<sub>4</sub>.

| Atoms               | Angle (°)  | Atoms               | Angle (°) |
|---------------------|------------|---------------------|-----------|
| S(1)#4-Na(1)-S(2)#1 | 99.12(9)   | S(3)-La(1)-S(1)#6   | 91.59(4)  |
| S(1)#4-Na(1)-S(3)#3 | 91.60(8)   | S(3)-La(1)-S(1)#7   | 144.01(4) |
| S(1)#4-Na(1)-S(3)#1 | 106.81(10) | S(3)-La(1)-S(2)#6   | 102.01(4) |
| S(1)#4-Na(1)-S(3)#5 | 93.29(9)   | S(3)-La(1)-S(2)#2   | 73.67(4)  |
| S(2)-Na(1)-S(1)#4   | 174.68(13) | S(3)-La(1)-S(4)     | 72.30(4)  |
| S(2)-Na(1)-S(2)#1   | 75.65(8)   | S(3)-La(1)-S(4)#2   | 140.24(3) |
| S(2)-Na(1)-S(3)#5   | 85.50(8)   | S(3)-La(1)-S(4)#7   | 76.88(4)  |
| S(2)#1-Na(1)-S(3)#1 | 66.72(8)   | S(4)-La(1)-S(1)#6   | 138.64(3) |
| S(2)-Na(1)-S(3)#1   | 72.22(8)   | S(4)#2-La(1)-S(1)#7 | 68.11(3)  |
| S(2)-Na(1)-S(3)#3   | 92.47(8)   | S(4)#2-La(1)-S(1)#6 | 122.82(4) |
| S(3)#5-Na(1)-S(2)#1 | 86.59(8)   | S(4)-La(1)-S(1)#7   | 90.31(4)  |
| S(3)#3-Na(1)-S(2)#1 | 128.56(12) | S(4)-La(1)-S(2)#6   | 151.27(3) |
| S(3)#5-Na(1)-S(3)#1 | 148.45(10) | S(4)#2-La(1)-S(2)#2 | 67.79(4)  |
| S(3)#3-Na(1)-S(3)#1 | 62.02(7)   | S(4)-La(1)-S(2)#2   | 77.30(4)  |
| S(3)#5-Na(1)-S(3)#3 | 143.12(13) | S(4)#2-La(1)-S(2)#6 | 76.86(4)  |
| S(1)#6-La(1)-S(1)#7 | 80.91(4)   | S(4)#2-La(1)-S(4)#7 | 129.35(3) |
| S(1)#7-La(1)-S(2)#6 | 107.47(4)  | S(4)-La(1)-S(4)#7   | 67.76(4)  |
| S(1)#6-La(1)-S(2)#2 | 135.43(4)  | S(4)#2-La(1)-S(4)   | 89.76(3)  |
| S(1)#6-La(1)-S(2)#6 | 68.14(4)   | S(1)-Si(1)-S(2)     | 106.63(7) |
| S(1)#7-La(1)-S(4)#7 | 67.33(4)   | S(1)-Si(1)-S(4)     | 106.30(8) |
| S(1)#6-La(1)-S(4)#7 | 71.59(4)   | S(2)-Si(1)-S(4)     | 102.82(7) |
| S(2)#2-La(1)-S(1)#7 | 134.07(3)  | S(3)-Si(1)-S(1)     | 113.67(8) |
| S(2)#2-La(1)-S(2)#6 | 74.13(3)   | S(3)-Si(1)-S(2)     | 114.85(8) |
| S(2)#6-La(1)-S(4)#7 | 139.67(3)  | S(3)-Si(1)-S(4)     | 111.67(7) |
| S(2)#2-La(1)-S(4)#7 | 139.63(4)  |                     |           |

Symmetry transformations used to generate equivalent atoms:

#1 x, -y+1/2, z-1/2; #2 x, -y+1/2, z+1/2; #3 -x+1, y-1/2, -z+3/2; #4 -x+1, y-1/2, -z+1/2;

#5 -x+1, -y+1, -z+1; #6 x, y, z+1; #7 -x+2, -y+1, b-z+2.

**Table S16.** Selected bond lengths (Å) of NaLaSiSe<sub>4</sub>.

| Atoms         | Distance (Å) | Atoms         | Distance (Å) |
|---------------|--------------|---------------|--------------|
| Na(1)-Se(1)#1 | 3.298(7)     | La(1)-Se(2)#7 | 3.1440(11)   |
| Na(1)-Se(1)   | 2.902(5)     | La(1)-Se(3)   | 3.0843(11)   |
| Na(1)-Se(2)#3 | 2.921(5)     | La(1)-Se(4)#2 | 3.0899(10)   |
| Na(1)-Se(3)#4 | 3.210(6)     | La(1)-Se(4)   | 3.0969(11)   |
| Na(1)-Se(3)#5 | 3.256(6)     | La(1)-Se(4)#7 | 3.2670(11)   |
| Na(1)-Se(3)#1 | 3.334(7)     | Si(1)-Se(1)   | 2.257(3)     |
| La(1)-Se(1)#6 | 3.1654(11)   | Si(1)-Se(2)   | 2.260(3)     |
| La(1)-Se(1)#2 | 3.1332(11)   | Si(1)-Se(3)   | 2.229(3)     |
| La(1)-Se(2)#6 | 3.1166(11)   | Si(1)-Se(4)   | 2.284(3)     |

Symmetry transformations used to generate equivalent atoms:

#1  $x, -y+1/2, z+1/2$ ; #2  $x, -y+1/2, z-1/2$ ; #3  $-x+1, y-1/2, -z+3/2$ ; #4  $-x+1, -y+1, -z+1$ ;

#5  $-x+1, y-1/2, -z+1/2$ ; #6  $x, y, z-1$ ; #7  $-x, -y+1, -z$ .

**Table S17.** Selected bond angles (°) of NaLaSiSe<sub>4</sub>.

| Atoms                 | Angle (°)  | Atoms                 | Angle (°)  |
|-----------------------|------------|-----------------------|------------|
| Se(1)-Na(1)-Se(1)#1   | 74.61(15)  | Se(3)-La(1)-Se(1)#2   | 72.75(3)   |
| Se(1)-Na(1)-Se(2)#3   | 177.1(2)   | Se(3)-La(1)-Se(1)#6   | 100.10(3)  |
| Se(1)-Na(1)-Se(3)#4   | 84.22(14)  | Se(3)-La(1)-Se(2)#7   | 145.43(3)  |
| Se(1)-Na(1)-Se(3)#5   | 92.66(14)  | Se(3)-La(1)-Se(2)#6   | 89.90(3)   |
| Se(1)-Na(1)-Se(3)#1   | 72.13(14)  | Se(3)-La(1)-Se(4)#2   | 141.30(3)  |
| Se(1)#1-Na(1)-Se(3)#1 | 69.06(15)  | Se(3)-La(1)-Se(4)#7   | 76.49(3)   |
| Se(2)#3-Na(1)-Se(1)#1 | 103.84(18) | Se(3)-La(1)-Se(4)     | 75.16(3)   |
| Se(2)#3-Na(1)-Se(3)#1 | 109.72(19) | Se(4)#2-La(1)-Se(1)#2 | 69.47(3)   |
| Se(2)#3-Na(1)-Se(3)#4 | 93.29(16)  | Se(4)-La(1)-Se(1)#2   | 77.52(3)   |
| Se(2)#3-Na(1)-Se(3)#5 | 90.18(15)  | Se(4)-La(1)-Se(1)#6   | 150.72(3)  |
| Se(3)#4-Na(1)-Se(1)#1 | 86.55(14)  | Se(4)#2-La(1)-Se(1)#6 | 77.15(3)   |
| Se(3)#5-Na(1)-Se(1)#1 | 130.8(2)   | Se(4)#2-La(1)-Se(2)#7 | 66.57(3)   |
| Se(3)#4-Na(1)-Se(3)#1 | 149.5(2)   | Se(4)-La(1)-Se(2)#6   | 137.64(3)  |
| Se(3)#5-Na(1)-Se(3)#1 | 61.83(11)  | Se(4)-La(1)-Se(2)#7   | 88.95(3)   |
| Se(3)#4-Na(1)-Se(3)#5 | 140.3(3)   | Se(4)#2-La(1)-Se(2)#6 | 123.50(3)  |
| Se(1)#2-La(1)-Se(1)#6 | 73.55(2)   | Se(4)-La(1)-Se(4)#7   | 67.44(3)   |
| Se(1)#2-La(1)-Se(2)#7 | 134.13(3)  | Se(4)#2-La(1)-Se(4)   | 88.69(3)   |
| Se(1)#2-La(1)-Se(4)#7 | 138.06(3)  | Se(4)#2-La(1)-Se(4)#7 | 129.48(2)  |
| Se(1)#6-La(1)-Se(4)#7 | 140.51(3)  | Se(1)-Si(1)-Se(2)     | 105.95(10) |
| Se(2)#7-La(1)-Se(1)#6 | 108.02(3)  | Se(1)-Si(1)-Se(4)     | 102.68(10) |
| Se(2)#6-La(1)-Se(1)#2 | 135.92(3)  | Se(2)-Si(1)-Se(4)     | 106.25(11) |
| Se(2)#6-La(1)-Se(1)#6 | 70.06(3)   | Se(3)-Si(1)-Se(1)     | 113.86(12) |
| Se(2)#6-La(1)-Se(2)#7 | 81.42(3)   | Se(3)-Si(1)-Se(2)     | 113.85(11) |
| Se(2)#6-La(1)-Se(4)#7 | 70.60(3)   | Se(3)-Si(1)-Se(4)     | 113.29(10) |
| Se(2)#7-La(1)-Se(4)#7 | 69.05(3)   |                       |            |

Symmetry transformations used to generate equivalent atoms:

#1 x, -y+1/2, z+1/2; #2 x, -y+1/2, z-1/2; #3 -x+1, y-1/2, -z+3/2; #4 -x+1, -y+1, -z+1;

#5 -x+1, y-1/2, -z+1/2; #6 x, y, z-1; #7 -x, -y+1, -z.

**Table S18.** Structure and optical properties of the  $A^I\text{RE}^{\text{III}}\text{C}^{\text{IV}}\text{Q}^{\text{VI}}_4$  ( $A^I = \text{Ag, Li} \sim \text{Cs}$ ;  $\text{RE}^{\text{III}} = \text{Y, La} \sim \text{Nd, Sm} \sim \text{Yb}$ ;  $\text{C}^{\text{IV}} = \text{Si, Ge}$ ;  $\text{Q}^{\text{VI}} = \text{S, Se}$ ) family compounds.

| No | Compound              | Space group             | Band gap (eV)          | SHG( $\times$ AGS) | LIDT( $\times$ AGS) | $\Delta n$ | Ref      |
|----|-----------------------|-------------------------|------------------------|--------------------|---------------------|------------|----------|
| 1  | AgLaSiS <sub>4</sub>  | <i>P2<sub>1</sub>/c</i> | 3.33 <sup>a</sup>      | /                  | /                   | 0.114      | <i>c</i> |
| 2  | AgYSiS <sub>4</sub>   | <i>P2<sub>1</sub>/c</i> | 3.18 <sup>a</sup>      | /                  | /                   | 0.129      | <i>c</i> |
| 3  | NaLaSiS <sub>4</sub>  | <i>P2<sub>1</sub>/c</i> | 3.83 <sup>b</sup>      | /                  | /                   | 0.130      | <i>c</i> |
| 4  | NaLaSiSe <sub>4</sub> | <i>P2<sub>1</sub>/c</i> | 3.02 <sup>b</sup>      | /                  | /                   | 0.160      | <i>c</i> |
| 5  | LiLaSiS <sub>4</sub>  | <i>Ama2</i>             | 3.71 <sup>a</sup>      | 2                  | 14                  | 0.033      | 1        |
| 6  | LiCeSiS <sub>4</sub>  | <i>Ama2</i>             | 2.92 <sup>a</sup>      | 2.1                | 9                   | 0.054      | 1        |
| 7  | KLaSiS <sub>4</sub>   | <i>P2<sub>1</sub></i>   | 3.31 <sup>b</sup>      | 0.2                | /                   | 0.048      | 2        |
| 8  | KLaSiS <sub>4</sub>   | <i>P2<sub>1</sub>/m</i> | /                      | /                  | /                   | /          | 3        |
| 9  | KYSiS <sub>4</sub>    | <i>P2<sub>1</sub></i>   | 3.58 <sup>b</sup>      | 0.3                | /                   | 0.080      | 2        |
| 10 | KCeSiS <sub>4</sub>   | <i>P2<sub>1</sub></i>   | 2.33-2.51 <sup>a</sup> | /                  | /                   | /          | 4        |
| 11 | KCeSiS <sub>4</sub>   | <i>P2<sub>1</sub>/m</i> | /                      | /                  | /                   | /          | 5        |
| 12 | KPrSiS <sub>4</sub>   | <i>P2<sub>1</sub></i>   | /                      | /                  | /                   | /          | 6        |
| 13 | KNdSiS <sub>4</sub>   | <i>P2<sub>1</sub></i>   | /                      | /                  | /                   | /          | 6        |
| 14 | KEuSiS <sub>4</sub>   | <i>P2<sub>1</sub></i>   | 1.72 <sup>a</sup>      | /                  | /                   | /          | 7        |
| 15 | KYbSiS <sub>4</sub>   | <i>P2<sub>1</sub></i>   | /                      | /                  | /                   | /          | 8        |
| 16 | KLaSiSe <sub>4</sub>  | <i>P2<sub>1</sub></i>   | 2.76 <sup>b</sup>      | 0.5                | /                   | 0.080      | 2        |
| 17 | KPrSiSe <sub>4</sub>  | <i>P2<sub>1</sub></i>   | /                      | /                  | /                   | /          | 9        |
| 18 | KLaGeS <sub>4</sub>   | <i>P2<sub>1</sub></i>   | 3.34 <sup>a</sup>      | 1.2                | /                   | 0.098      | 10       |
| 19 | KYGeS <sub>4</sub>    | <i>P2<sub>1</sub></i>   | 3.15 <sup>a</sup>      | 1                  | /                   | 0.12       | 11       |
| 20 | KNdGeS <sub>4</sub>   | <i>P2<sub>1</sub></i>   | /                      | /                  | /                   | /          | 12       |
| 21 | KEuGeS <sub>4</sub>   | <i>P2<sub>1</sub></i>   | 1.71 <sup>a</sup>      | /                  | /                   | /          | 7        |
| 22 | KGdGeS <sub>4</sub>   | <i>P2<sub>1</sub></i>   | /                      | /                  | /                   | /          | 12       |
| 23 | KTbGeS <sub>4</sub>   | <i>P2<sub>1</sub></i>   | /                      | /                  | /                   | /          | 13       |
| 24 | KLaGeSe <sub>4</sub>  | <i>P2<sub>1</sub></i>   | 2.47 <sup>b</sup>      | 1.2                | /                   | 0.106      | 2        |
| 25 | KCeGeSe <sub>4</sub>  | <i>P2<sub>1</sub></i>   | 1.70-1.93 <sup>a</sup> | /                  | /                   | /          | 9        |
| 26 | KPrGeSe <sub>4</sub>  | <i>P2<sub>1</sub></i>   | /                      | /                  | /                   | /          | 13       |
| 27 | KSmGeSe <sub>4</sub>  | <i>P2<sub>1</sub></i>   | 2.2 <sup>a</sup>       | /                  | /                   | /          | 14       |
| 28 | RbLaSiS <sub>4</sub>  | <i>Pnma</i>             | /                      | /                  | /                   | /          | 3        |
| 29 | RbCeSiS <sub>4</sub>  | <i>Pnma</i>             | /                      | /                  | /                   | /          | 6        |

|    |                       |              |                  |      |   |   |    |
|----|-----------------------|--------------|------------------|------|---|---|----|
| 30 | RbPrSiS <sub>4</sub>  | $P2_12_12_1$ | /                | /    | / | / | 6  |
| 31 | RbNdSiS <sub>4</sub>  | $P2_12_12_1$ | /                | /    | / | / | 6  |
| 32 | RbEuSiS <sub>4</sub>  | $P2_12_12_1$ | /                | /    | / | / | 15 |
| 33 | RbGdSiS <sub>4</sub>  | $P2_12_12_1$ | /                | /    | / | / | 6  |
| 34 | RbTbSiS <sub>4</sub>  | $P2_12_12_1$ | /                | /    | / | / | 6  |
| 35 | RbDySiS <sub>4</sub>  | $P2_12_12_1$ | /                | /    | / | / | 6  |
| 36 | RbHoSiS <sub>4</sub>  | $P2_12_12_1$ | /                | /    | / | / | 6  |
| 37 | RbLaGeS <sub>4</sub>  | $P2_12_12_1$ | /                | /    | / | / | 6  |
| 38 | RbEuGeS <sub>4</sub>  | $P2_1/m$     | /                | /    | / | / | 9  |
| 39 | RbSmGeSe <sub>4</sub> | $P2_12_12_1$ | 2.2 <sup>a</sup> | /    | / | / | 14 |
| 40 | CsLaSiS <sub>4</sub>  | $Pnma$       | /                | /    | / | / | 6  |
| 41 | CsCeSiS <sub>4</sub>  | $Pnma$       | /                | /    | / | / | 16 |
| 42 | CsPrSiS <sub>4</sub>  | $P2_12_12_1$ | /                | /    | / | / | 6  |
| 43 | CsNdSiS <sub>4</sub>  | $P2_12_12_1$ | /                | /    | / | / | 6  |
| 44 | CsSmSiS <sub>4</sub>  | $P2_12_12_1$ | /                | /    | / | / | 17 |
| 45 | CsEuSiS <sub>4</sub>  | $P2_12_12_1$ | /                | /    | / | / | 17 |
| 46 | CsGdSiS <sub>4</sub>  | $P2_12_12_1$ | /                | /    | / | / | 17 |
| 47 | CsTbSiS <sub>4</sub>  | $P2_12_12_1$ | /                | /    | / | / | 17 |
| 48 | CsDySiS <sub>4</sub>  | $P2_12_12_1$ | /                | /    | / | / | 17 |
| 49 | CsHoSiS <sub>4</sub>  | $P2_12_12_1$ | /                | /    | / | / | 17 |
| 50 | CsErSiS <sub>4</sub>  | $P2_12_12_1$ | /                | /    | / | / | 17 |
| 51 | CsTmSiS <sub>4</sub>  | $P2_12_12_1$ | /                | /    | / | / | 17 |
| 52 | CsCeSiSe <sub>4</sub> | $P2_12_12_1$ | /                | /    | / | / | 16 |
| 53 | CsLaGeS <sub>4</sub>  | $P2_12_12_1$ | 3.6 <sup>a</sup> | 0.01 | / | / | 6  |
| 54 | CsCeGeS <sub>4</sub>  | $P2_12_12_1$ | /                | /    | / | / | 6  |
| 55 | CsPrGeS <sub>4</sub>  | $P2_12_12_1$ | /                | /    | / | / | 6  |
| 56 | CsNdGeS <sub>4</sub>  | $P2_12_12_1$ | /                | /    | / | / | 6  |
| 57 | CsSmGeS <sub>4</sub>  | $P2_12_12_1$ | /                | /    | / | / | 18 |
| 58 | CsEuGeS <sub>4</sub>  | $P2_12_12_1$ | /                | /    | / | / | 6  |
| 59 | CsGdGeS <sub>4</sub>  | $P2_1/n$     | /                | /    | / | / | 6  |
| 60 | CsTbGeS <sub>4</sub>  | $P2_12_12_1$ | /                | /    | / | / | 6  |
| 61 | CsSmGeSe <sub>4</sub> | $P2_12_12_1$ | 2.2 <sup>a</sup> | /    | / | / | 14 |

*a*: experimental band gap; *b*: theoretical band gap; *c*: this work.

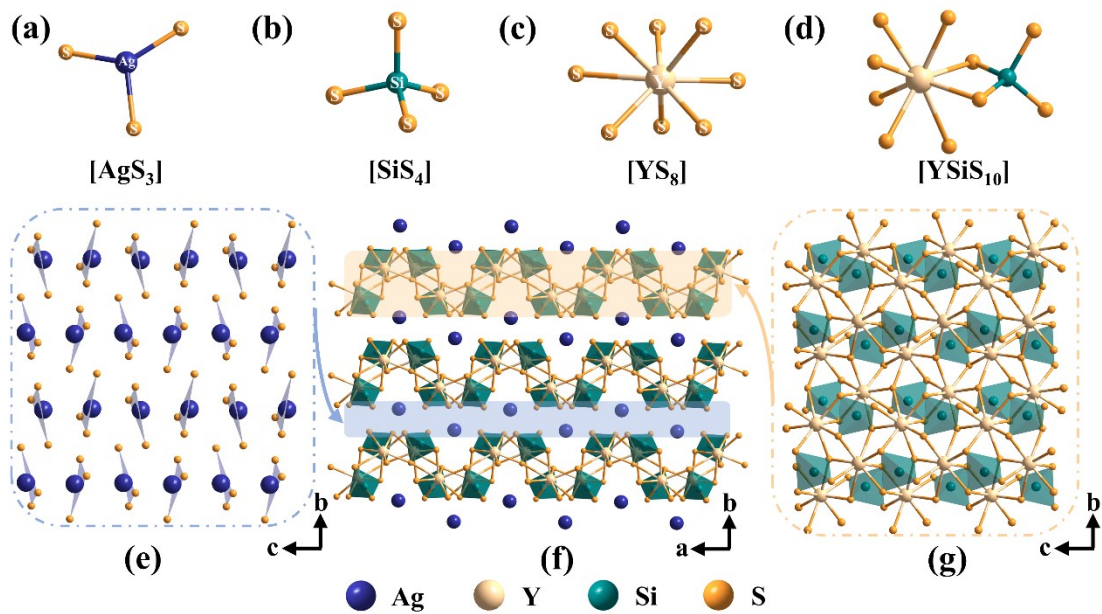

**Figure S1.** Crystal structure of  $\text{AgYSiS}_4$ . (a, b, c) The coordination environments of Ag, Si, and Y atoms in the compound; (d) The formed  $[\text{YSiS}_{10}]$  dimer; (e) The formed  $[\text{AgS}_3]$  pseudo-layers in  $\text{AgYSiS}_4$ ; (f) The 3D crystal structure of  $\text{AgYSiS}_4$  viewed along  $c$  direction; (g) The formed 2D  $[\text{YSiS}_{10}]_\infty$  layers viewed along  $a$  direction.

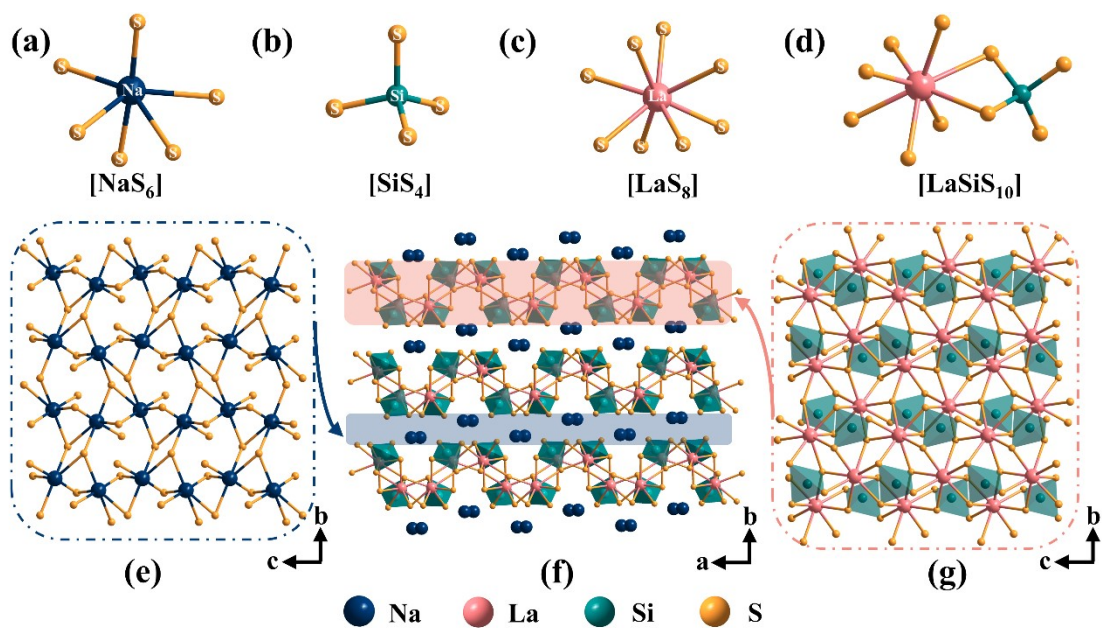

**Figure S2.** Crystal structure of NaLaSi<sub>4</sub>. (a-c) The coordination environments of Na, Si, and La atoms in the compound; (d) The formed [LaSiS<sub>10</sub>] dimer; (e) The formed channel-like [NaS<sub>6</sub>]<sub>∞</sub> framework in NaLaSi<sub>4</sub>; (f) The 3D crystal structure of NaLaSi<sub>4</sub> viewed along *c* direction; (g) The formed 2D [LaSiS<sub>10</sub>]<sub>∞</sub> layers viewed along *a* direction.

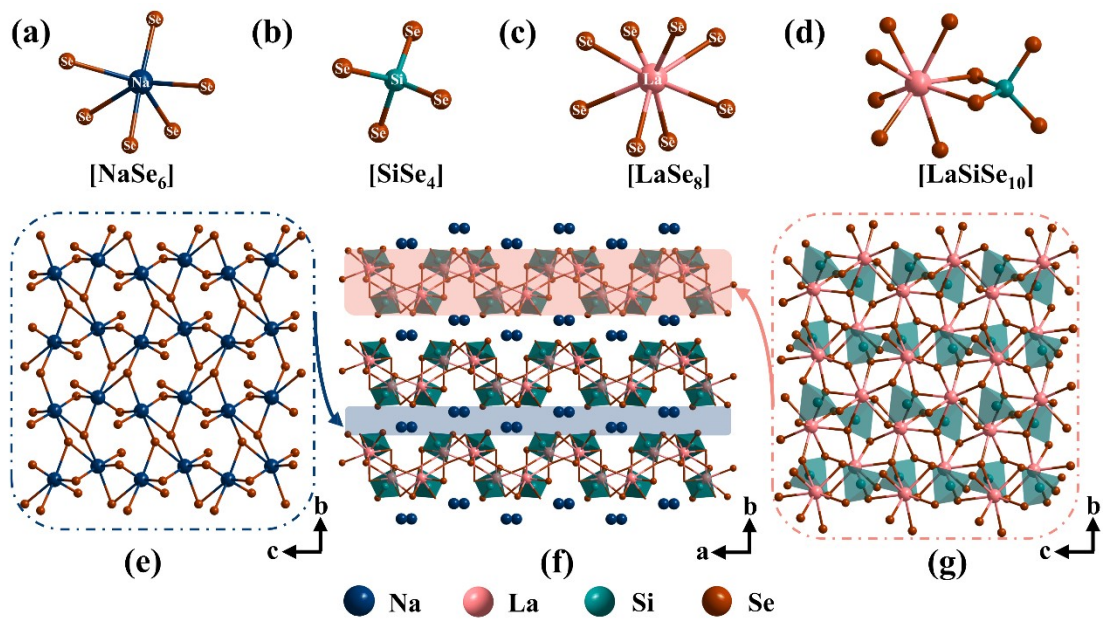

**Figure S3.** Crystal structure of NaLaSiSe<sub>4</sub>. (a-c) The coordination environments of Na, Si, and La atoms in the compound; (d) The formed [LaSiSe<sub>10</sub>] dimer; (e) The formed channel-like [NaSe<sub>6</sub>]<sub>∞</sub> framework in NaLaSiSe<sub>4</sub>; (f) The 3D crystal structure of NaLaSiSe<sub>4</sub> viewed along *c* direction; (g) The formed 2D [LaSiSe<sub>10</sub>]<sub>∞</sub> layers viewed along *a* direction.



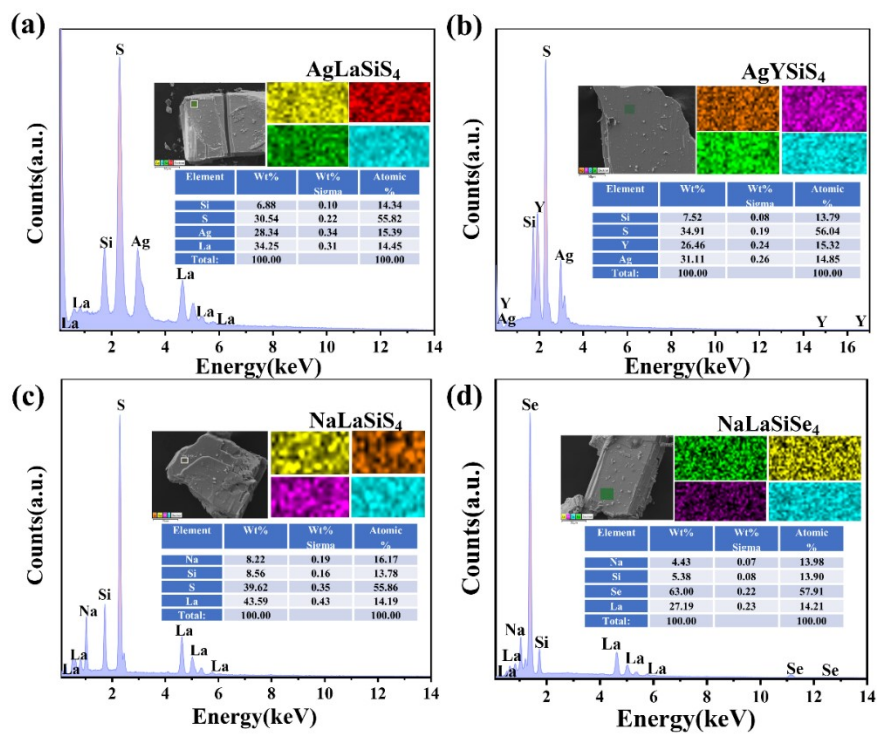

**Figure S4.** X-ray energy dispersive spectra and mappings of (a) AgLaSi<sub>4</sub>, (b) AgYSi<sub>4</sub>, (c) NaLaSi<sub>4</sub>, and (d) NaLaSiSe<sub>4</sub>.

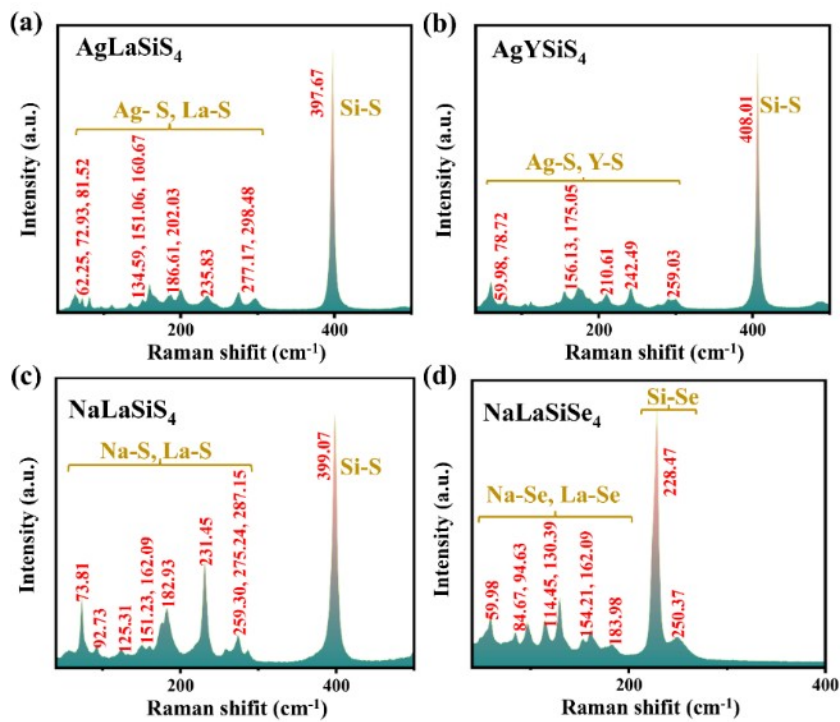

**Figure S5.** Raman spectra of (a) AgLaSi<sub>4</sub>, (b) AgYSi<sub>4</sub>, (c) NaLaSi<sub>4</sub>, and (d) NaLaSiSe<sub>4</sub>.

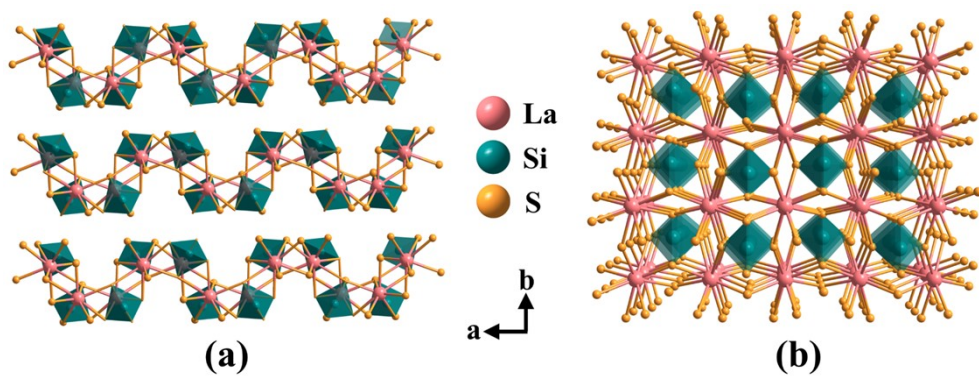

**Figure S6.** The [LaSiS]<sub>∞</sub> framework shape built by [LaS<sub>8</sub>] and [SiS<sub>4</sub>] in (a) ALaSiS<sub>4</sub> (A = Ag, Na, K, Rb, Cs), (b) LiLaSiS<sub>4</sub>.

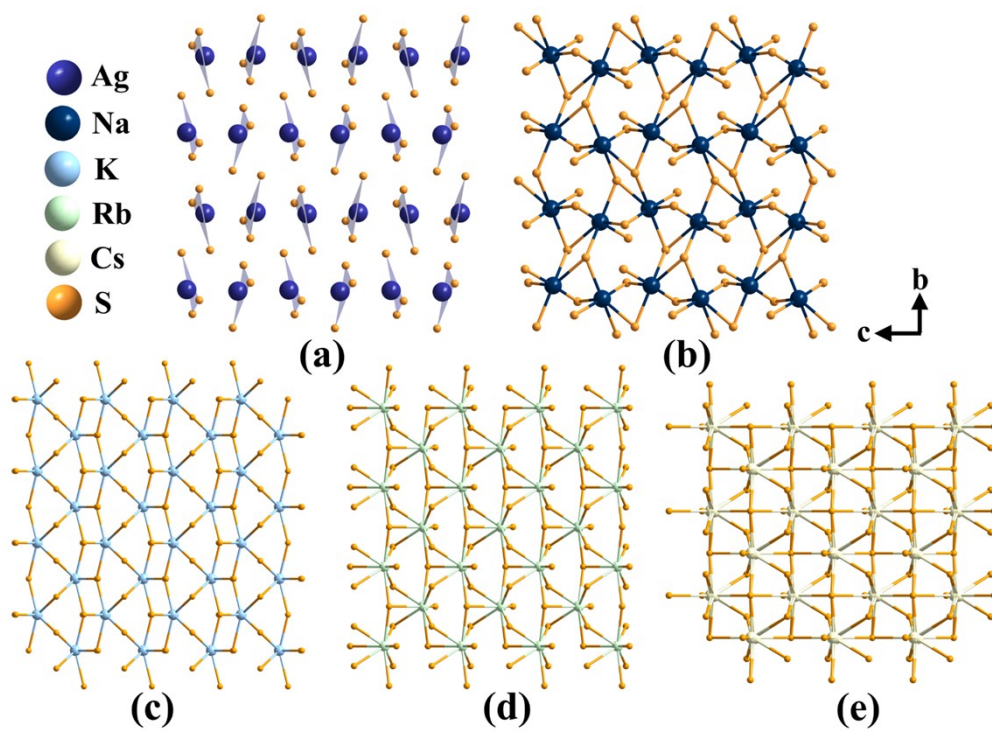

**Figure S7.** The [AgS<sub>3</sub>] (a), [NaS<sub>6</sub>] (b), [KS<sub>8</sub>] (c), [RbS<sub>8</sub>] (d), and [CsS<sub>8</sub>] (d) framework in ALaSi<sub>4</sub> (A = Ag, Na, K, Rb, Cs).

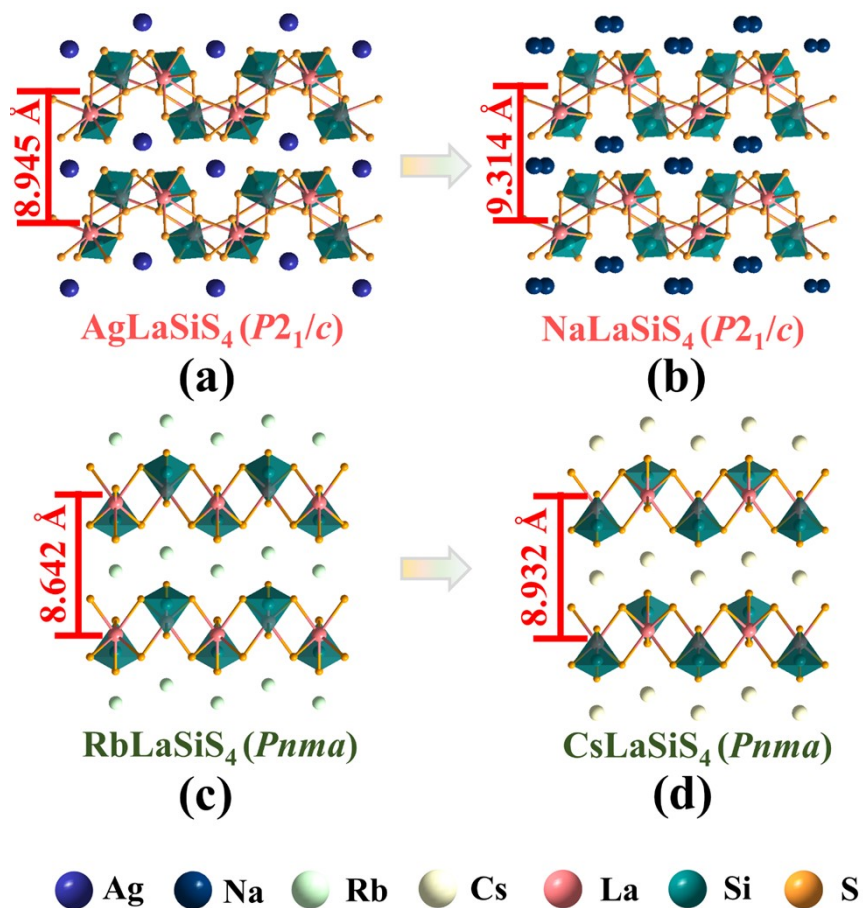

**Figure S8.** The variation of layer spacing from  $\text{AgLaSi}_4$  to  $\text{NaLaSi}_4$  (a-b), and from  $\text{RbLaSi}_4$  to  $\text{CsLaSi}_4$  (c-d).

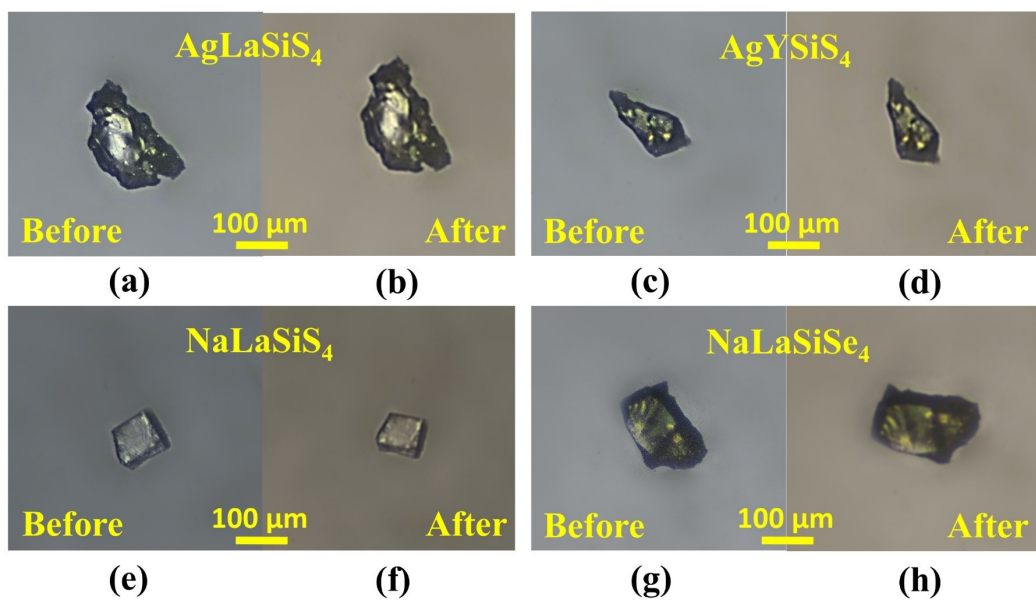

**Figure S9.** The optical images of  $\text{A}^{\text{I}}\text{RE}^{\text{III}}\text{SiQ}^{\text{VI}}_4$  ( $\text{A}^{\text{I}} = \text{Ag, Na}$ ;  $\text{RE}^{\text{III}} = \text{La, Y}$ ;  $\text{Q}^{\text{VI}} = \text{S, Se}$ ) before (a, c, e, g) and after (b, d, f, h) soaking in deionized water for 7 days.

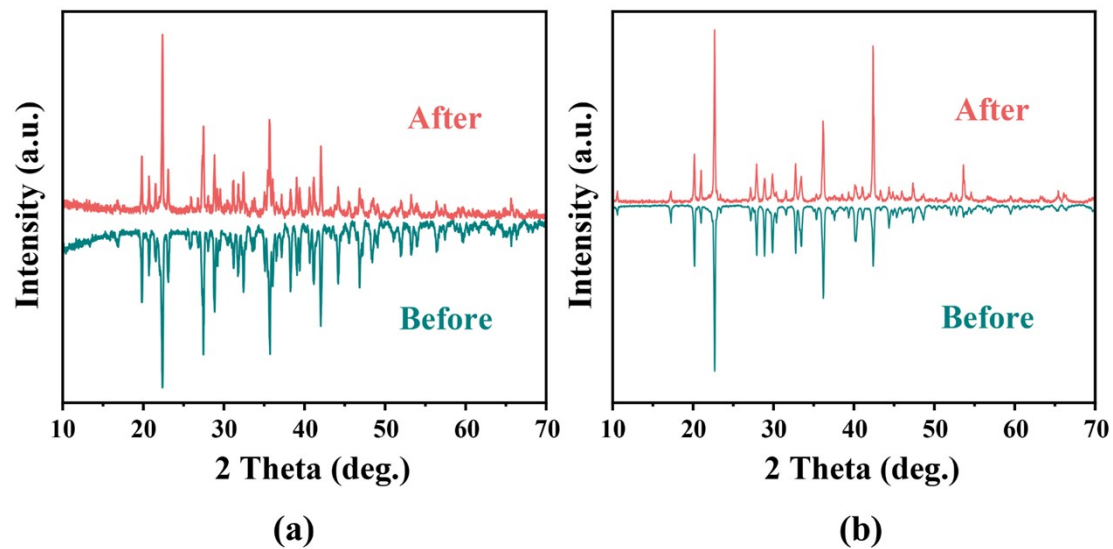

**Figure S10.** The XRD patterns of the polycrystalline AgLaSi<sub>4</sub> (a) and AgYSi<sub>4</sub> (b) powder samples before and after exposure in air for 6 months.

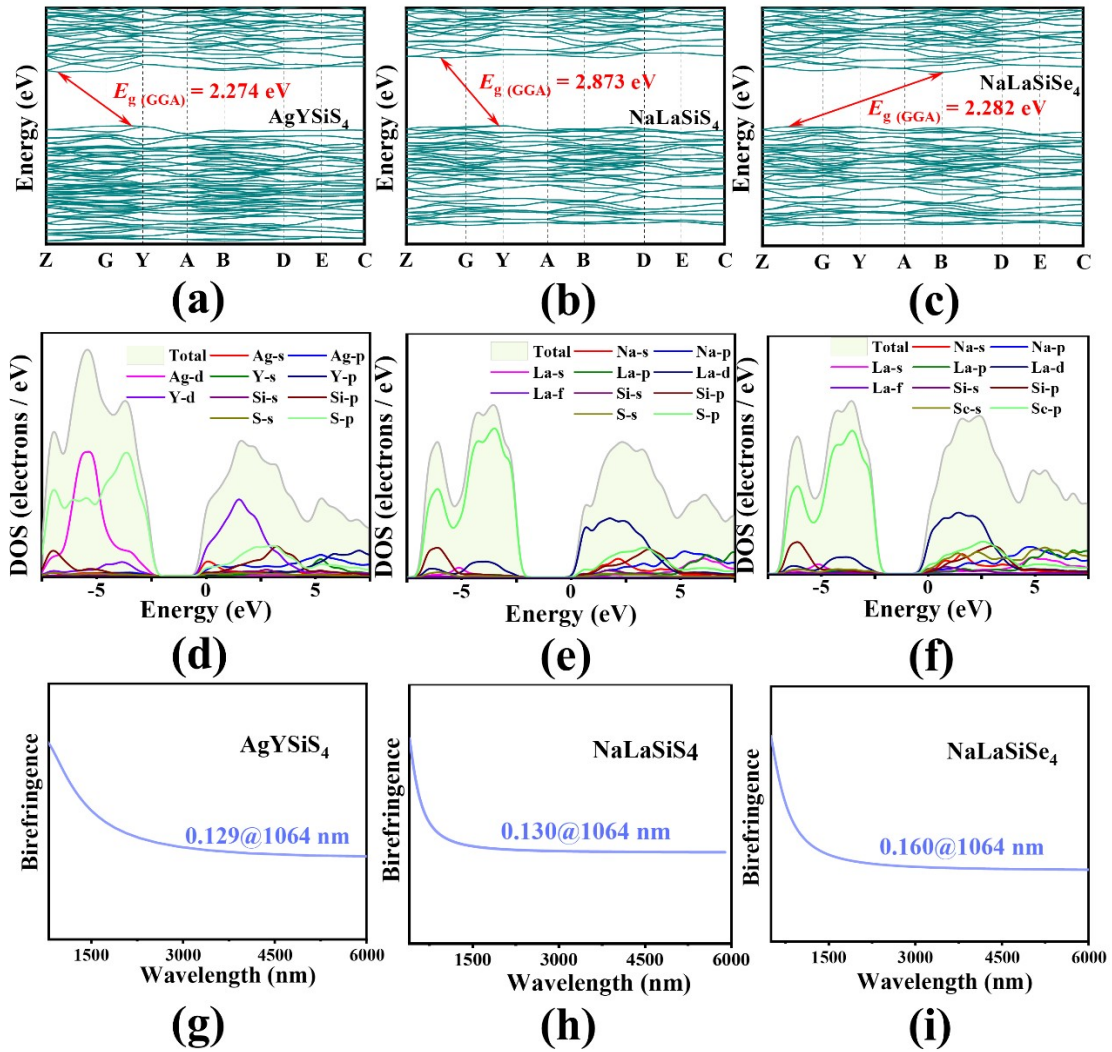

**Figure S11.** The band structures, the total and partial density of states and the birefringence curves of (a, d, g) AgYSiS<sub>4</sub>, (b, e, h) NaLaSiS<sub>4</sub>, and (c, f, i) NaLaSiSe<sub>4</sub>.



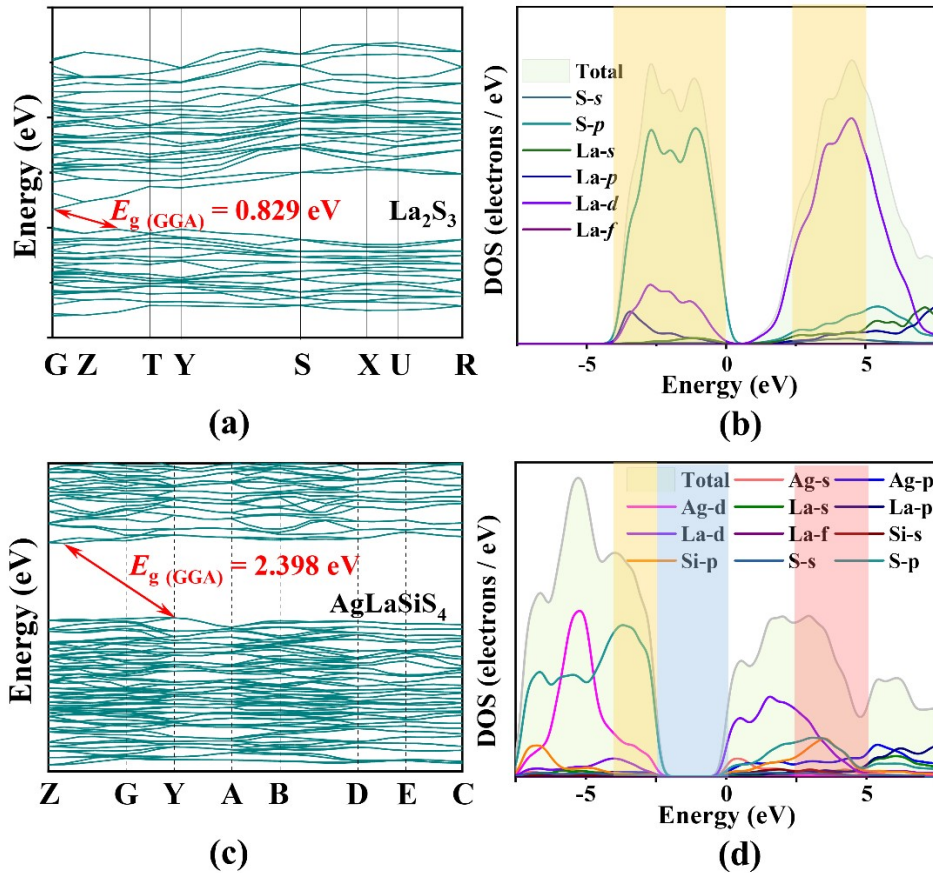

**Figure S12.** The band structures, and the total and partial density of states of  $\text{La}_2\text{S}_3$  (a-b),  $\text{AgLaSiS}_4$  (c-d).

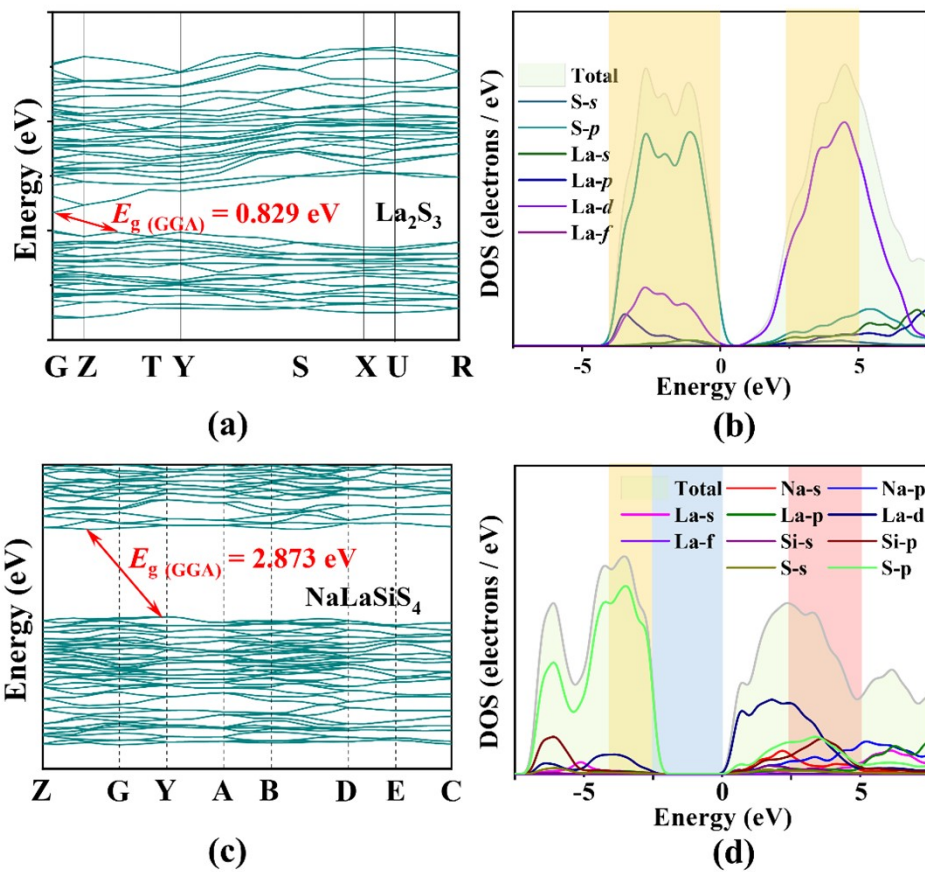

**Figure S13.** The band structures, and the total and partial density of states of  $\text{La}_2\text{S}_3$  (a-b),  $\text{NaLaSiS}_4$  (c-d).

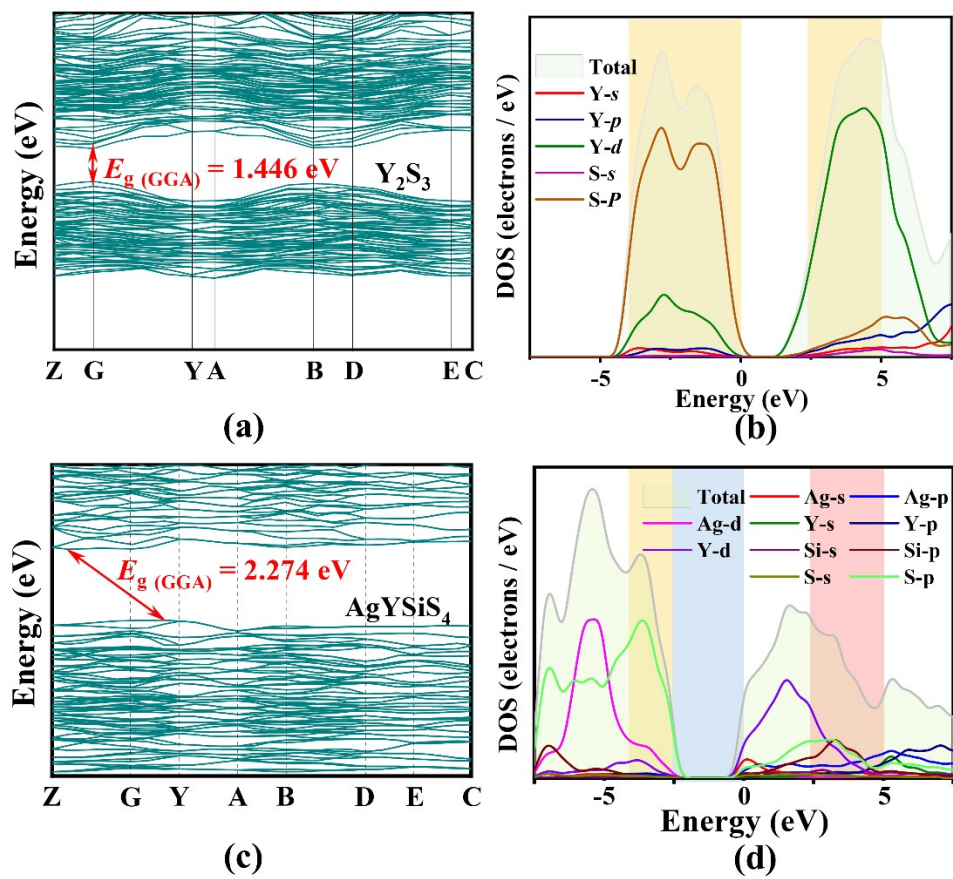

**Figure S14.** The band structures, and the total and partial density of states of  $\text{Y}_2\text{S}_3$  (a-b),  $\text{AgYSi}_4$  (c-d).

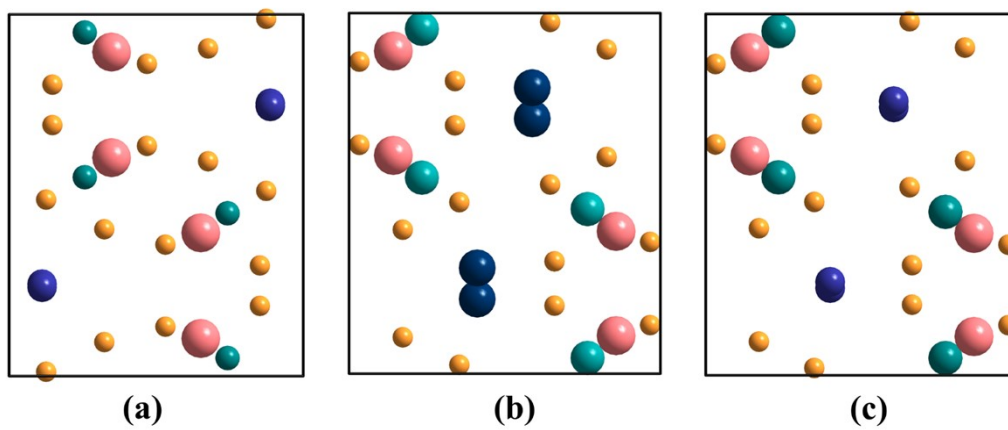

**Figure S15.** Atomic models of  $\text{AgLaSiS}_4$  (a),  $\text{NaLaSiS}_4$  (b) and the virtual  $\text{AgLaSiS}_4$  (c) from  $\text{NaLaSiS}_4$ .

## References

1. Y. Han, C. Hu, B. Li and J. Mao, LnLiSiS<sub>4</sub> (Ln = La and Ce): promising infrared nonlinear optical materials designed by aliovalent substitution from SrCdSiS<sub>4</sub>, *Mater. Today Phys.*, 2023, **31**, 100987.
2. L. Dong, S. Zhang, P. Gong, L. Kang and Z. Lin, Evaluation and prospect of mid-infrared nonlinear optical materials in *f*<sup>0</sup> rare earth (RE = Sc, Y, La) chalcogenides, *Coord. Chem. Rev.*, 2024, **509**, 215805.
3. I. Hartenbach and T. Schleid, Thiosilicate der selten-erd-eemente: III. KLa[SiS<sub>4</sub>] und RbLa[SiS<sub>4</sub>] – ein struktureller vergleich, *Z. Anorg. Allg. Chem.*, 2005, **631**, 1365-1370.
4. G. Gauthier, F. Guillen, S. Jobic, P. Deniard, P. Macaudière, C. Fouassier and R. Brec, Synthesis, structure and electronic properties of the cerium and potassium thiosilicate: KCeSiS<sub>4</sub>, *Comptes Rendus de l'Académie des Sciences - Series IIC - Chem.*, 1999, **2**, 611-616.
5. I. Hartenbach and T. Schleid, Thiosilicate der selten-erd-elemente: i. die isotypen verbindungen KCe[SiS<sub>4</sub>] und Eu<sub>2</sub>[SiS<sub>4</sub>], *Z. Anorg. Allg. Chem.*, 2002, **628**, 1327-1331.
6. M. Usman, M. D. Smith, G. Morrison, V. V. Klepov, W. Zhang, P. S. Halasyamani and H. zur Loye, Molten alkali halide flux growth of an extensive family of noncentrosymmetric rare earth sulfides: structure and magnetic and optical (SHG) properties, *Inorg. Chem.*, 2019, **58**, 8541-8550.
7. Evenson and P. K. Dorhout, Synthesis and characterization of four new europium group XIV chalcogenides: K<sub>2</sub>EuTSe<sub>5</sub> and KEuTS<sub>4</sub> (T = Si, Ge), *Inorg. Chem.*, 2001, **40**, 2409-2414.
8. A. Gray, J. Knaust, B. Chan, L. Polyakova and P. Dorhout, Crystal structure of potassium ytterbium (III) tetrathiosilicate, KYbSiS<sub>4</sub>, *Z. Kristallogr. New cryst. struct.*, 2005, **220**, 313-313.
9. A. Choudhury, L. A. Polyakova, I. Hartenbach, T. Schleid and P. K. Dorhout, Synthesis, structures, and properties of layered quaternary chalcogenides of the general formula ALnEQ<sub>4</sub> (A= K, Rb; Ln= Ce, Pr, Eu; E= Si, Ge; Q= S, Se), *Z.*

- Anorg. Allg. Chem.*, 2006, **632**, 2395-2401.
10. Y. Liu, X. Li, S. Wu, M. Ma, X. Jiang, Y. Wu and D. Mei, A rare earth chalcogenide nonlinear optical crystal  $\text{KLaGeS}_4$ : achieving good balance among band gap, second harmonic generation effect, and birefringence, *Inorg. Chem.*, 2024, **63**, 10938-10942.
  11. D. Mei, W. Cao, N. Wang, X. Jiang, J. Zhao, W. Wang, J. Dang, S. Zhang, Y. Wu, P. Rao and Z. Lin, Breaking through the "3.0 eV wall" of energy band gap in mid-infrared nonlinear optical rare earth chalcogenides by charge-transfer engineering, *Mater. Horiz.*, 2021, **8**, 2330-2334.
  12. P. Wu and J. A. Ibers, Synthesis and structures of the quaternary chalcogenides of the type  $\text{KLnMQ}_4$  ( $\text{Ln} = \text{La, Nd, Gd, Y}$ ;  $\text{M} = \text{Si, Ge}$ ;  $\text{Q} = \text{S, Se}$ ), *J. Solid State Chem.*, 1993, **107**, 347-355.
  13. B. Chan and P. Dorhout, Crystal structures of potassium terbium (III) tetrasulfidogermanate,  $\text{KTbGeS}_4$ , and potassium praseodymium (III) tetraselenidogermanate,  $\text{KPrGeSe}_4$ , *Z. Kristallogr. New cryst. struct.*, 2005, **220**, 7-8.
  14. B. R. Martin and P. K. Dorhout, Molten flux synthesis of an analogous series of layered alkali samarium selenogermanate compounds, *Inorg. Chem.*, 2004, **43**, 385-391.
  15. A. Choudhury, L. A. Polyakova, I. Hartenbach, T. Schleid and P. K. J. I. c. Dorhout, Synthesis, structures, and properties of layered quaternary chalcogenides of the general formula  $\text{ALnEQ}_4$  ( $\text{A} = \text{K, Rb}$ ;  $\text{Ln} = \text{Ce, Pr, Eu}$ ;  $\text{E} = \text{Si, Ge}$ ;  $\text{Q} = \text{S, Se}$ ), *Z. Anorg. Allg. Chem.*, 2006, **632**, 2395-2401.
  16. I. Hartenbach and T. Schleid, The non-isotypic pair  $\text{CsCe}[\text{SiS}_4]$  and  $\text{CsCe}[\text{SiSe}_4]$ : A structural comparison, *J. Alloy Compd.*, 2006, **418**, 95-100.
  17. I. Hartenbach and T. Schleid, Thiosilicate der selten-erd-elemente: II. die nichtzentrosymmetrischen caesium-derivate  $\text{CsM}[\text{SiS}_4]$  ( $\text{M} = \text{Sm - Tm}$ ), *Z. Anorg. Allg. Chem.*, 2003, **629**, 394-398.
  18. C. K. Bucher and S.-J. Hwu,  $\text{CsSmGeS}_4$ : a novel layered mixed-metal sulfide crystallizing in the noncentrosymmetric space group  $P2_12_12_1$ , *Inorg. Chem.*, 1994,

**33**, 5831-5835.
